# Supplementary material
Source: ML conference proceedings conference paper supplement (https://openaccess.thecvf.com/content/WACV2024/html/Giazitzis_SigmML_Metric_Meta-Learning_WACV_2024_paper.html)
Supplement: Supplementary file 1 [file Giazitzis_SigmML_Metric_Meta-Learning_WACV_2024_supplemental.pdf]

# SigmML: Metric meta-learning for Writer Independent Offline Signature Verification in the Space of SPD Matrices (Supplementary Material)

Alexios Giazitzis and Elias N. Zois  
Telsip Laboratory, UniWA  
Petrou Ralli & Thivon Ave., 12241, Egaleo, Greece  
{ene262017050, ezois}@uniwa.gr

## 1. Covariance matrix computation

Let us denote with  $P$  the number of signature trace pixels in  $I$ . The image covariance matrix  $\mathbf{C}$  of  $d$  image features  $F(I)$  is computed by Eq. (1):

$$\mathbf{C} = \frac{1}{P-1} \sum_{i=1}^P (f_i - \bar{f})^T (f_i - \bar{f}) \in \mathcal{S}_d^+ \quad (1)$$

where  $f_i$  corresponds to the  $i$ -th pixels's  $d$ -dimensional vector of features,  $\bar{f}$  corresponds to their mean vector and  $\mathcal{S}_d^+$  refers to the corresponding  $d$ -dimensional SPD manifold. We address the infrequent situation, that  $\mathbf{C}$  is not strictly positive definite, by adding to  $\mathbf{C}$  a small regularization term  $\lambda \mathbf{I}_{10 \times 10}$ , where  $\mathbf{I}_{10 \times 10}$  is the identity matrix and  $\lambda = 10^{-5}$ , *i.e.*  $\mathbf{C}_{new} = \mathbf{C}_{old} + \lambda \times \mathbf{I}_{10 \times 10}$ . Thus we continue by asserting that all signature covariance matrices are points in the  $\mathcal{S}_{10}^+$  manifold.

## 2. The optimization hyperparameters values

| Hyperparameter                      | Value |
|-------------------------------------|-------|
| Observation Epochs                  | 600   |
| Optimizer Learning Epochs           | 200   |
| Optimizer Learning Rate             | 0.001 |
| Handcrafted Optimizer Learning Rate | 0.01  |
| Learner Epochs                      | 50    |
| Data batch size                     | 512   |
| mLSTM layers                        | 2     |
| Optimization steps $\tau$           | 205   |
| Reset Steps $T$                     | 5     |
| Optimizer batch size $m$            | 12    |
| Similarity threshold $\zeta_s$      | 0.01  |
| Dissimilarity threshold $\zeta_d$   | 1     |

Table 1. Hyperparameter values for the learning process.
